# Supplementary material for: Production of Reactive Oxygen Species by Epicardial Adipocytes Is Associated with an Increase in Postprandial Glycemia, Postprandial Insulin, and a Decrease in Serum Adiponectin in Patients with Severe Coronary Atherosclerosis
Source: MDPI journal article supplement (doi:10.3390/biomedicines10082054), 2022-08-22
Supplement: s1 [file s1]

**Table S7.** Comparison of clinical and biochemical characteristics of patients with Gensini score more or less than 70.55 points.

| Parameters                                 | Group A<br>Patients with Gensini<br>score <70.55 (n=11) | Group B<br>Patients with<br>Gensini ≥ 70.55<br>(n=8) | P             |
|--------------------------------------------|---------------------------------------------------------|------------------------------------------------------|---------------|
| Gender (m/f), n (%)                        | 7(64) / 4(36)                                           | 7(87.5) / 1(12.5)                                    | >0.05         |
| Age, years, Me<br>(max-min)                | 62 (53-72)                                              | 64 (53-71)                                           | >0.05         |
| Diabetes<br>mellitus/Prediabetes,<br>n (%) | 4 (36.4)                                                | 7 (87.5)                                             | <b>0.0258</b> |
| BMI, kg/m <sup>2</sup>                     | 30.30 (27.40; 33.30)                                    | 29.10 (26.50; 34.83)                                 | 0.9           |
| Waist circumference,<br>cm                 | 105.0 (92.0; 110.0)                                     | 105.0 (100.3; 118.0)                                 | 0.99          |
| Waist-to-hip ratio                         | 0.98 (0.92; 1.11)                                       | 0.94 (0.93; 1.06)                                    | 0.99          |
| Fat free mass, kg                          | 57.50 (47.00; 61.80)                                    | 59.60 (56.70; 62.30)                                 | 0.52          |
| Fat mass, adjusted to<br>BMI, kg           | 36.30 (27.70; 40.00)                                    | 30.70 (30.40; 36.70)                                 | 0.99          |
| Skeletal muscle mass,<br>kg                | 24.30 (18.00; 27.80)                                    | 26.80 (25.80; 29.20)                                 | 0.62          |
| Fasting glycaemia,<br>mmol/L               | 5.80 (5.15;6.00)                                        | 5.70 (5.30;6.33)                                     | 0.96          |
| Postprandial<br>glycaemia, mmol/L          | 6.6 (5.3;7.9)                                           | 7.8 (6.6;7.9)                                        | 0.09          |

|                                                         |                     |                     |              |
|---------------------------------------------------------|---------------------|---------------------|--------------|
| Fasting insulin,<br>μU/mL                               | 6.5 (4.9;8.6)       | 5.3 (4.5;7.5557)    | 0.7          |
| Postprandial insulin,<br>μU/mL                          | 14.1 (11.87;18.1)   | 21.6 (9.7;33.5)     | 0.7          |
| HbA1c, %                                                | 5.7 (5.5;6.8)       | 6.8 (6.1;8.5)       | 0.07         |
| Total cholesterol,<br>mmol/L                            | 3.68 (3.01;4.31)    | 3.87 (2.88;4.52)    | 0.22         |
| Triacylglycerols,<br>mmol/L                             | 1.14 (0.90;1.43)    | 1.35 (1.23;1.85)    | 0.13         |
| HDL, mmol/L                                             | 1.04 (0.95;1.18)    | 1.04 (0.85;1.30)    | 0.93         |
| LDL, mmol/L                                             | 2.00 (1.55;2.40)    | 1.92 (1.62;2.55)    | 0.9          |
| Serum adiponectin,<br>adjusted to BWI,<br>μg/mL         | 8.07 (4.76;10.60)   | 6.26 (5.54;6.46)    | 0.3          |
| Serum leptin adjusted<br>to BWI and to gender,<br>ng/mL | 13.96 (11.01;20.77) | 24.77 (18.17;38.61) | <b>0.037</b> |
| Adiponectin-to-leptin<br>ratio                          | 0.63 (0.39;0.74)    | 0.28 (0.17;0.43)    | <b>0.015</b> |

Notes: Gensini score =70.55 points – median value of Gensini score in the sample adjusted to gender
